# Supplementary material for: Self knotting of a J tip guidewire during femoral hemodialysis catheterization in a resource limited setting
Source: Research Square preprint supplement (doi:10.21203/rs.3.rs-8233745/v1), 2025-12-16
Supplement: Supplementary file 1 [file 69ca44ba34e1762a8ed28e26.docx]

# CARE Checklist – Completed

| CARE Item | Description | Line Number |
| --- | --- | --- |
| Title | Identifies case as case report | 3 |
| Keywords | Provided | 18 |
| Abstract | Structured summary | 12 |
| Introduction | Background relevance | 19 |
| Patient information | Deidentified case details | 21 |
| Clinical findings | Findings on presentation | 21 |
| Timeline | Chronological table | N/A |
| Diagnostic assessment | Methods, reasoning | 21 |
| Therapeutic intervention | Treatments performed | 39 |
| Follow‑up and outcomes | Outcome clearly described | 39 |
| Discussion | Strengths/limitations/literature | 41 |
| Patient perspective | Patient’s viewpoint | N/A |
| Informed consent | Written consent documented | 9 |
